# Supplementary material for: TBHP-mediated highly efficient dehydrogenative cross-oxidative coupling of methylarenes with acetanilides
Source: publisher site journal article supplement (doi:10.3762/bjoc.12.217), 2016-10-25

## Supporting Information

for

# TBHP-mediated highly efficient dehydrogenative cross-oxidative coupling of methylarenes with acetanilides

Cui Chen\*, Weibing Liu and Peng Zhou

Address: College of Chemical Engineering, Guangdong University of Petrochemical Technology, 2 Guandu Road, Maoming 525000, P. R. China. Fax: +86-668-2923575; Tel: +86-668-2923444

Email: Cui Chen\* - cc161002@gdupt.edu.cn.

\*Corresponding author

### Full experimental details and copies of NMR spectral data

**General methods.** All the reactions were carried out at 80 °C for 24 h in a round-bottom flask equipped with magnetic stir bar. Solvents and reagents were purchased from Aldrich Chemicals or J & K Scientific Ltd, were used as received. Petroleum ether (PE) refers to the fraction boiling in the 60–90 °C range. Thin-layer chromatography was performed using Qingdao-Haiyang 600 mesh silica gel plates (GF254), and samples were made visual with short-wavelength UV light (254 nm). <sup>1</sup>H NMR and <sup>13</sup>C NMR spectra were recorded on a 400 MHz spectrometer in solutions of CDCl<sub>3</sub> using tetramethylsilane as the internal standard,  $\delta$  values are given in ppm and coupling constants (*J*) in Hz.

**Typical procedure: *N*-phenylbenzamide (Table 2, entry 1).** A mixture of *N*-phenylacetamide (**2a**, 135 mg, 1.0 mmol), iodine (254 mg, 1 mmol), TBHP (387 mg, 3.0 mmol, 70% in water) and toluene (2.0 mL) was added successively in a round-bottom flask, and the resulting soln. stirred for 24 h at 80 °C. The mixture was then subjected to purification by preparative thin-layer chromatography (PE–EtOAc, 10:3) to afford product **3aa**.

**Characterization data for all prepared compounds.**

***N*-phenylbenzamide (Table 2, entry 1)<sup>[1]</sup>**

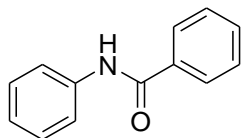

<sup>1</sup>H NMR (CDCl<sub>3</sub>, 400 MHz)  $\delta$ : 7.87 (m, 3H), 7.65 (d,  $J=8.0$  Hz, 2H), 7.55 (t,  $J=7.6$  Hz, 1H), 7.48 (t,  $J=7.6$  Hz, 2H), 7.37 (t,  $J=7.6$  Hz, 2H), 7.16 (t,  $J=7.6$  Hz, 1H); <sup>13</sup>C NMR (CDCl<sub>3</sub>, 100 MHz)  $\delta$ : 165.7, 137.9, 134.9, 131.8, 129.1, 128.8, 127.0, 124.5, 120.2.

***N*-(*p*-Tolyl)benzamide (Table 2, entry 2)<sup>[2]</sup>**

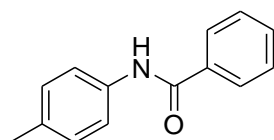

<sup>1</sup>H NMR (CDCl<sub>3</sub>, 400 MHz)  $\delta$ : 7.87 (d,  $J=7.2$  Hz, 2H), 7.81 (s, 1H), 7.52 (m, 5H), 7.18 (d,  $J=8.0$  Hz, 2H), 2.35 (s, 3H); <sup>13</sup>C NMR (CDCl<sub>3</sub>, 100 MHz)  $\delta$ : 165.2, 145.2, 135.7, 134.2, 131.7, 129.5, 128.7, 126.9, 120.3, 20.9.

***N*-(2-Chlorophenyl)benzamide (Table 2, entry 3)<sup>[3]</sup>**

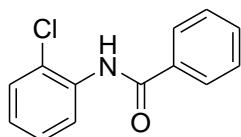

<sup>1</sup>H NMR (CDCl<sub>3</sub>, 400 MHz)  $\delta$ : 8.58 (d,  $J=8.0$  Hz, 1H), 8.46 (s, 1H), 7.93 (d,  $J=8.0$  Hz, 1H), 7.59 (t,  $J=7.6$  Hz, 1H), 7.53 (t,  $J=8.0$  Hz, 2H), 7.42 (d,  $J=8.0$  Hz, 1H), 7.34 (t,  $J=8.0$  Hz, 1H), 7.09 (d,  $J=8.0$  Hz, 1H); <sup>13</sup>C NMR (CDCl<sub>3</sub>, 100 MHz)  $\delta$ : 165.2, 134.7, 134.6, 132.2, 129.0, 128.9, 127.9, 127.1, 124.7, 123.0, 121.5.

***N*-(3-Chlorophenyl)benzamide (Table 2, entry 4)<sup>[3]</sup>**

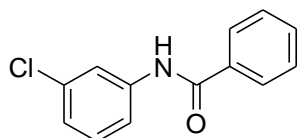

<sup>1</sup>H NMR (CDCl<sub>3</sub>, 400 MHz)  $\delta$ : 8.08 (s, 1H), 7.85 (d,  $J=8.0$  Hz, 2H), 7.77 (s, 1H), 7.51 (m, 4H), 7.26 (t,  $J=7.6$  Hz, 1H), 7.12 (t,  $J=8.0$  Hz, 1H); <sup>13</sup>C NMR (CDCl<sub>3</sub>, 100 MHz)  $\delta$ : 165.9, 139.1, 134.7, 134.5, 132.0, 130.0, 128.8, 127.0, 124.6, 120.4, 118.2.

***N*-(4-Chlorophenyl)benzamide (Table 2, entry 5)<sup>[1]</sup>**

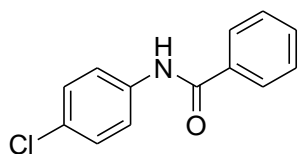

<sup>1</sup>H NMR (CDCl<sub>3</sub>, 400 MHz)  $\delta$ : 8.10 (d,  $J=8.0$  Hz, 2H), 7.90 (s, 1H), 7.65 (t,  $J=7.6$  Hz, 1H), 7.51 (m, 4H), 7.28 (d,  $J=8.0$  Hz, 2H); <sup>13</sup>C NMR (CDCl<sub>3</sub>, 100 MHz)  $\delta$ : 165.2, 135.2, 133.9, 130.1, 129.8, 129.1, 129.0, 128.8, 128.7, 121.5.

***N*-(4-Methoxyphenyl)benzamide (Table 2, entry 6)<sup>[4]</sup>**

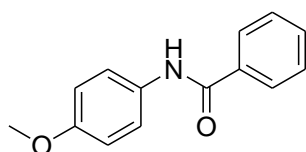

<sup>1</sup>H NMR (CDCl<sub>3</sub>, 400 MHz)  $\delta$ : 7.86 (d,  $J=8.0$  Hz, 2H), 7.73 (s, 1H), 7.53 (d,  $J=8.0$  Hz, 3H), 7.48 (t,  $J=7.6$  Hz, 2H), 6.91 (d,  $J=8.4$  Hz, 2H), 3.82 (s, 3H); <sup>13</sup>C NMR (CDCl<sub>3</sub>, 100 MHz)  $\delta$ : 164.8, 156.6, 151.8, 131.6, 130.9, 128.7, 126.9, 122.0, 114.2, 55.4.

***N*-(4-Ethoxyphenyl)benzamide (Table 2, entry 7)<sup>[5]</sup>**

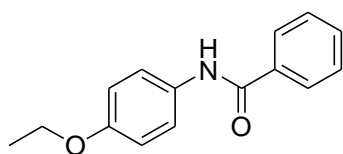

<sup>1</sup>H NMR (CDCl<sub>3</sub>, 400 MHz)  $\delta$ : 7.87 (d,  $J=8.0$  Hz, 2H), 7.74 (s, 1H), 7.50 (m, 5H), 6.90 (d,  $J=8.4$  Hz, 2H), 4.04 (q,  $J=7.6$  Hz, 2H), 1.42 (t,  $J=7.6$  Hz, 3H); <sup>13</sup>C NMR (CDCl<sub>3</sub>, 100 MHz)  $\delta$ : 168.6, 155.8, 131.5, 130.5, 128.7, 126.9, 121.9, 114.9, 63.9, 14.8.

***N*-(4-Cyanophenyl)benzamide (Table 2, entry 8)<sup>[6]</sup>**

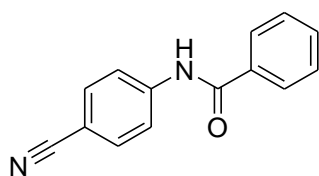

<sup>1</sup>H NMR (CDCl<sub>3</sub>, 400 MHz)  $\delta$ : 8.08 (s, 1H), 7.87 (d,  $J=8.0$  Hz, 2H), 7.80 (d,  $J=8.0$  Hz, 2H), 7.65 (d,  $J=7.6$  Hz, 2H), 7.65 (t,  $J=7.6$  Hz, 1H), 7.51 (t,  $J=7.2$  Hz, 2H); <sup>13</sup>C NMR (CDCl<sub>3</sub>, 100 MHz)  $\delta$ : 165.8, 142.0, 134.0, 133.3, 132.5, 128.9, 127.1, 119.9, 118.8, 107.3.

***N*-(*o*-Tolyl)benzamide (Table 2, entry 9)<sup>[7]</sup>**

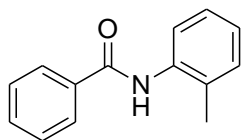

<sup>1</sup>H NMR (CDCl<sub>3</sub>, 400 MHz)  $\delta$ : 7.89 (d,  $J$ =7.6 Hz, 2H), 7.77 (s, 1H), 7.57 (t,  $J$ =7.6 Hz, 1H), 7.49 (d,  $J$ =7.6 Hz, 2H), 7.25 (m, 2H), 7.13 (t,  $J$ =7.6 Hz, 1H), 2.33 (s, 3H); <sup>13</sup>C NMR (CDCl<sub>3</sub>, 100 MHz)  $\delta$ : 165.7, 135.7, 135.0, 131.8, 130.5, 129.4, 128.8, 127.0, 126.8, 125.4, 123.3, 17.8.

***N*-(*m*-Tolyl)benzamide (Table 2, entry 10)<sup>[7]</sup>**

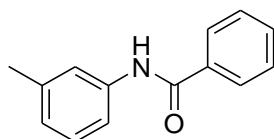

<sup>1</sup>H NMR (CDCl<sub>3</sub>, 400 MHz)  $\delta$ : 7.79 (s, 1H), 7.70 (s, 1H), 7.65 (m, 3H), 7.37 (m, 4H), 7.16 (t,  $J$ =8.0 Hz, 1H), 2.45 (s, 3H); <sup>13</sup>C NMR (CDCl<sub>3</sub>, 100 MHz)  $\delta$ : 165.9, 145.0, 138.7, 134.3, 132.6, 129.1, 128.6, 127.7, 124.5, 123.9, 120.1, 21.4.

**4-Methyl-*N*-phenylbenzamide (Table 2, entry 11)<sup>[1]</sup>**

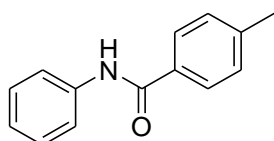

<sup>1</sup>H NMR (CDCl<sub>3</sub>, 400 MHz)  $\delta$ : 7.76 (s, 1H), 7.52 (d,  $J$ =7.6 Hz, 2H), 7.32 (t,  $J$ =7.6 Hz, 2H), 7.25 (t,  $J$ =7.6 Hz, 1H), 7.14 (d,  $J$ =7.6 Hz, 2H), 7.09 (d,  $J$ =8.0 Hz, 2H), 2.31 (s, 3H); <sup>13</sup>C NMR (CDCl<sub>3</sub>, 100 MHz)  $\delta$ : 172.8, 143.0, 139.2, 129.5, 129.3, 129.0, 128.4, 127.9, 120.2, 21.5.

**4-Methyl-*N*-(*p*-tolyl)benzamide (Table 2, entry 12)<sup>[7]</sup>**

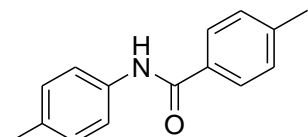

<sup>1</sup>H NMR (CDCl<sub>3</sub>, 400 MHz)  $\delta$ : 7.90 (s, 1H), 7.77 (d,  $J$ =7.6 Hz, 2H), 7.53 (d,  $J$ =8.0 Hz, 2H), 7.27 (d,  $J$ =8.0 Hz, 2H), 7.17 (d,  $J$ =7.6 Hz, 2H), 2.43 (s, 3H), 2.35 (s, 3H); <sup>13</sup>C NMR (CDCl<sub>3</sub>, 100 MHz)  $\delta$ : 165.6, 142.1, 135.5, 134.0, 132.1, 129.5, 129.3, 127.0, 120.3, 21.4, 20.8.

***N*-(2-Chlorophenyl)-4-methylbenzamide (Table 2, entry 13)<sup>[8]</sup>**

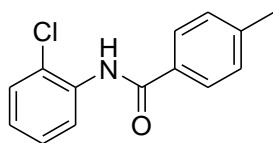

<sup>1</sup>H NMR (CDCl<sub>3</sub>, 400 MHz)  $\delta$ : 7.93 (s, 1H), 7.45 (d,  $J$ =7.6 Hz, 2H), 7.36 (d,  $J$ =7.2 Hz, 1H), 7.17 (m, 3H), 7.09 (d,  $J$ =7.2 Hz, 1H), 7.03 (d,  $J$ =7.6 Hz, 2H), 2.24 (s, 3H); <sup>13</sup>C NMR (CDCl<sub>3</sub>, 100 MHz)  $\delta$ : 172.0, 142.8, 137.2, 132.8, 131.9, 130.5, 129.9, 129.1, 128.9, 128.8, 127.8, 21.5.

***N*-(3-Chlorophenyl)-4-methylbenzamide (Table 2, entry 14)<sup>[9]</sup>**

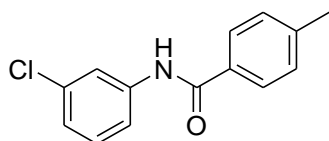

<sup>1</sup>H NMR (CDCl<sub>3</sub>, 400 MHz)  $\delta$ : 8.08 (s, 1H), 7.76 (m, 3H), 7.50 (d,  $J$ =8.0 Hz, 1H), 7.26 (m, 3H), 7.11 (t,  $J$ =7.2 Hz, 2H), 2.42 (s, 3H); <sup>13</sup>C NMR (CDCl<sub>3</sub>, 100 MHz)  $\delta$ : 165.8, 142.6, 139.2, 134.6, 131.6, 129.8, 129.4, 127.1, 124.4, 120.3, 118.2, 21.5.

***N*-(4-Methoxyphenyl)-4-methylbenzamide (Table 2, entry 15)<sup>[7]</sup>**

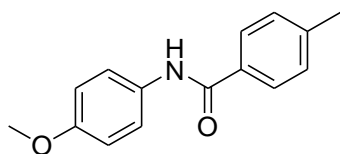

<sup>1</sup>H NMR (CDCl<sub>3</sub>, 400 MHz)  $\delta$ : 7.68 (m, 3H), 7.45 (d,  $J$ =8.0 Hz, 2H), 7.19 (d,  $J$ =8.0 Hz, 2H), 6.82 (d,  $J$ =7.6 Hz, 2H), 2.41 (s, 3H), 2.33 (s, 3H); <sup>13</sup>C NMR (CDCl<sub>3</sub>, 100 MHz)  $\delta$ : 179.9, 165.4, 142.2, 135.4, 134.0, 132.2, 129.5, 129.4, 127.0, 120.2, 21.4, 20.9 .

## References

- [1] Roy, S.; Sarma, M. J.; Kashyap, B.; Phukan, P. *Chem. Commun.* **2016**, 52, 1170-1173.
- [2] Iranpoor, N.; Panahi, F.; Roozbin, F.; Erfan, S.; Rahimi, S. *Eur. J. Org. Chem.* **2016**, 9, 1781-1787.
- [3] Tan, B.; Teo, Y. C. *Org. Bio. Chem.* **2014**, 12, 7478-7481.
- [4] Hong, M.; Tang, X. Y.; Falivene, L.; Caporaso, L.; Cavallo, L.; Chen, E. *J. Am. Chem. Soc.* **2016**, 138, 2021-2035.
- [5] Ji, Y. F.; Yan, H.; Jiang, Q. B. *Eur. J. Org. Chem.* **2015**, 9, 2051-2060.
- [6] Dutta, U.; Lupton, D. W.; Maiti, D. *Org. Lett.* **2016**, 18, 860-863.

- [7] Sharma, N.; Sekar, G. *Adv. Synth. Cat.* **2016**, 358, 314-320.
- [8] Demmer, C. S.; Hansen, J. C.; Kehler, J.; Bunch, L. *Adv. Synth. Cat.* **2014**, 356, 1047-1055.
- [9] Lee, B. C.; Yoon, J. H.; Lee, C. G.; Lee, I. J. *Phys. Org. Chem.* **1994**, 7, 273-279.

## NMR spectra

### *N*-Phenylbenzamide (Table 2, entry 1)

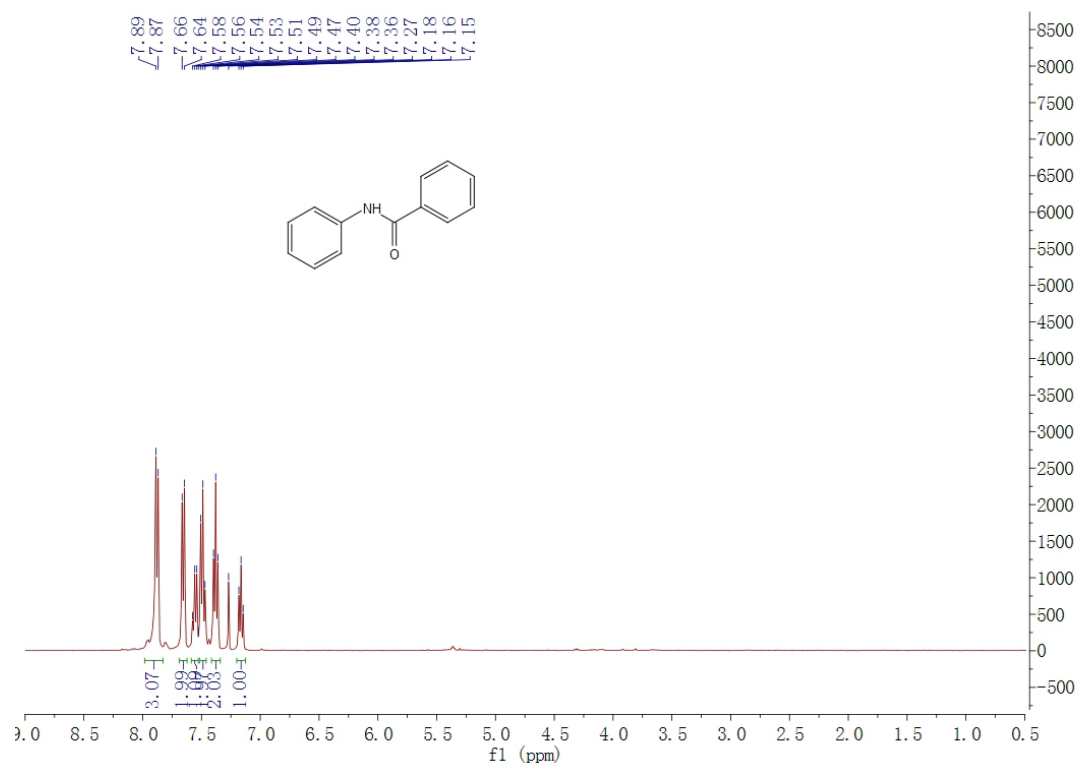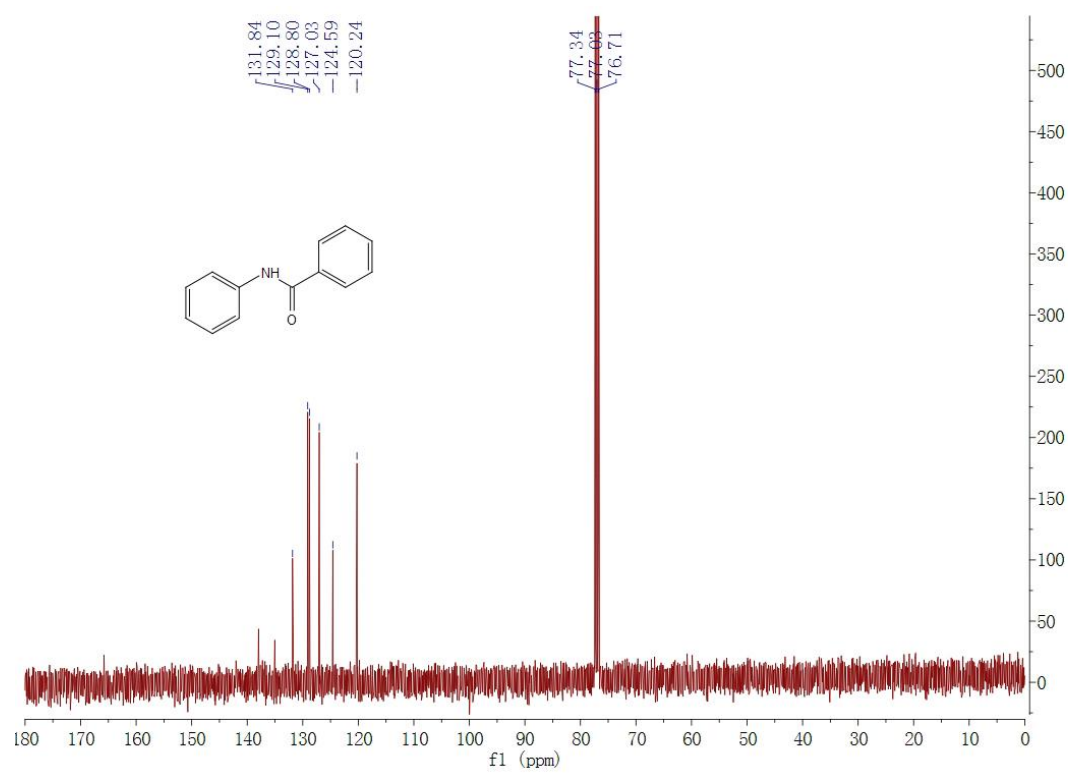

***N*-(*p*-Tolyl)benzamide (Table 2, entry 2)**

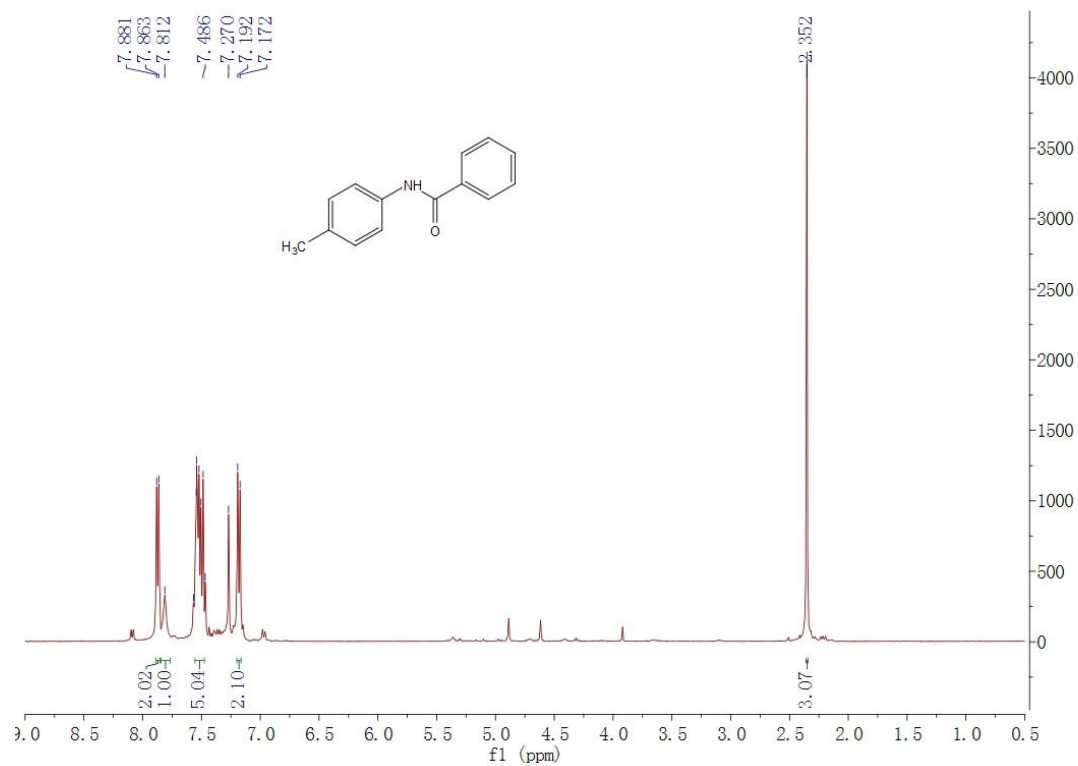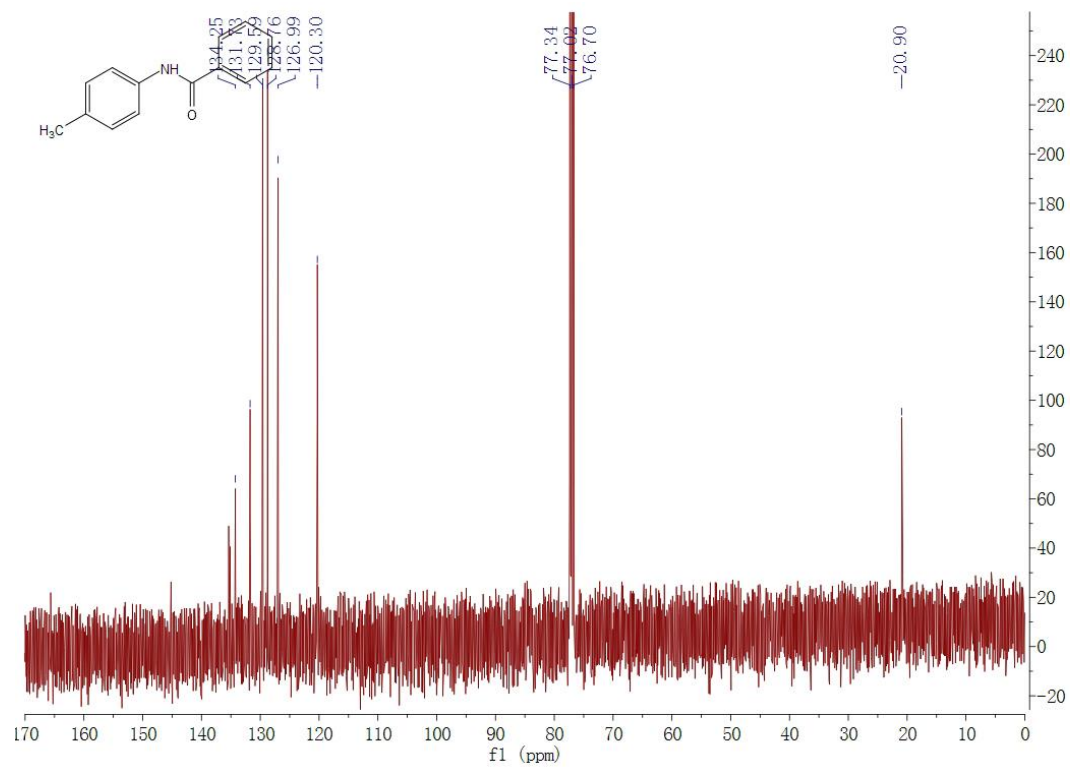



***N*-(2-Chlorophenyl)benzamide (Table 2, entry 3)**

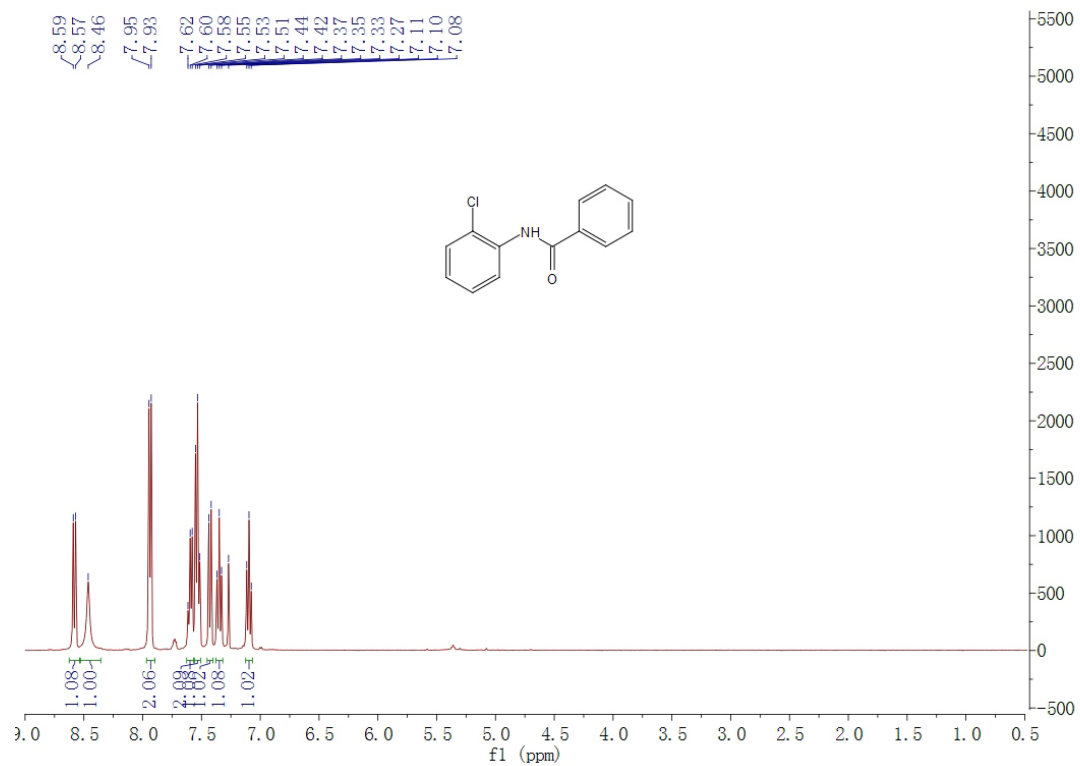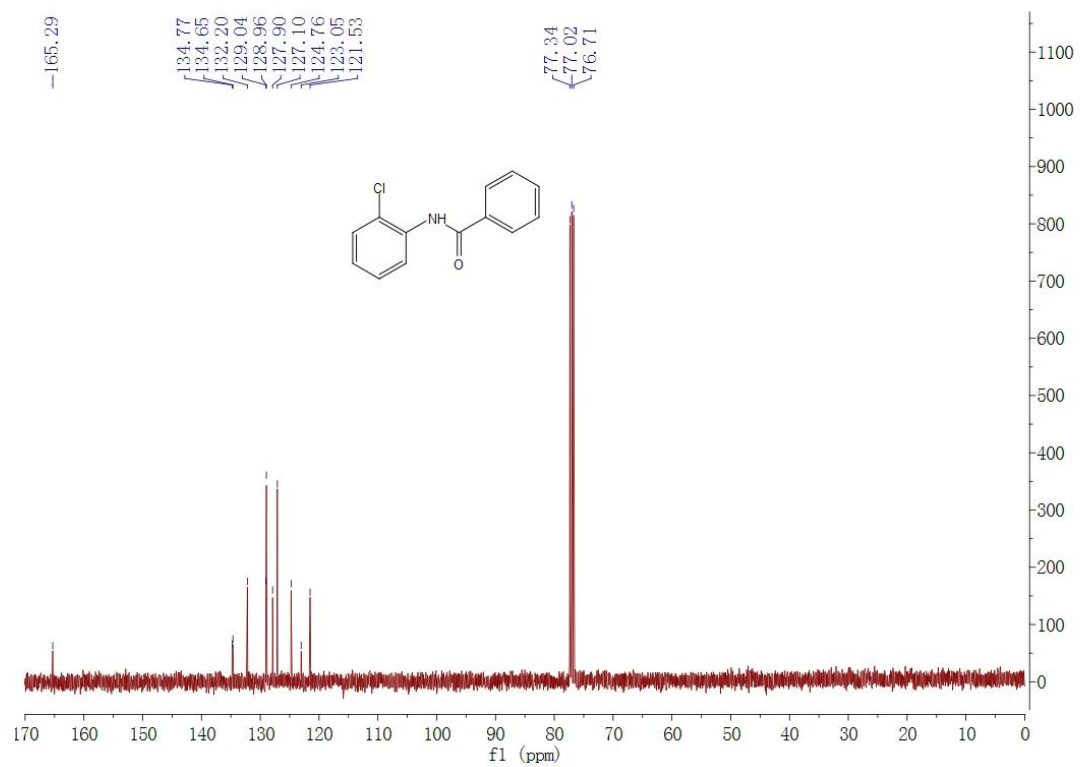

***N*-(3-Chlorophenyl)benzamide (Table 2, entry 4)**

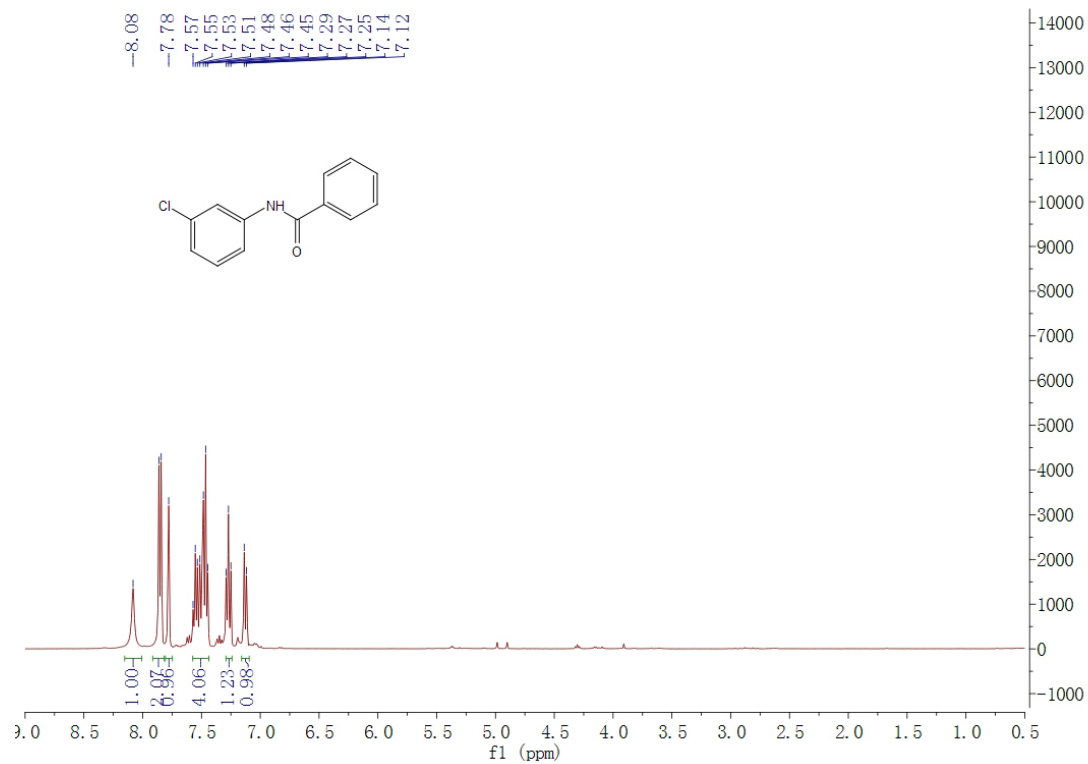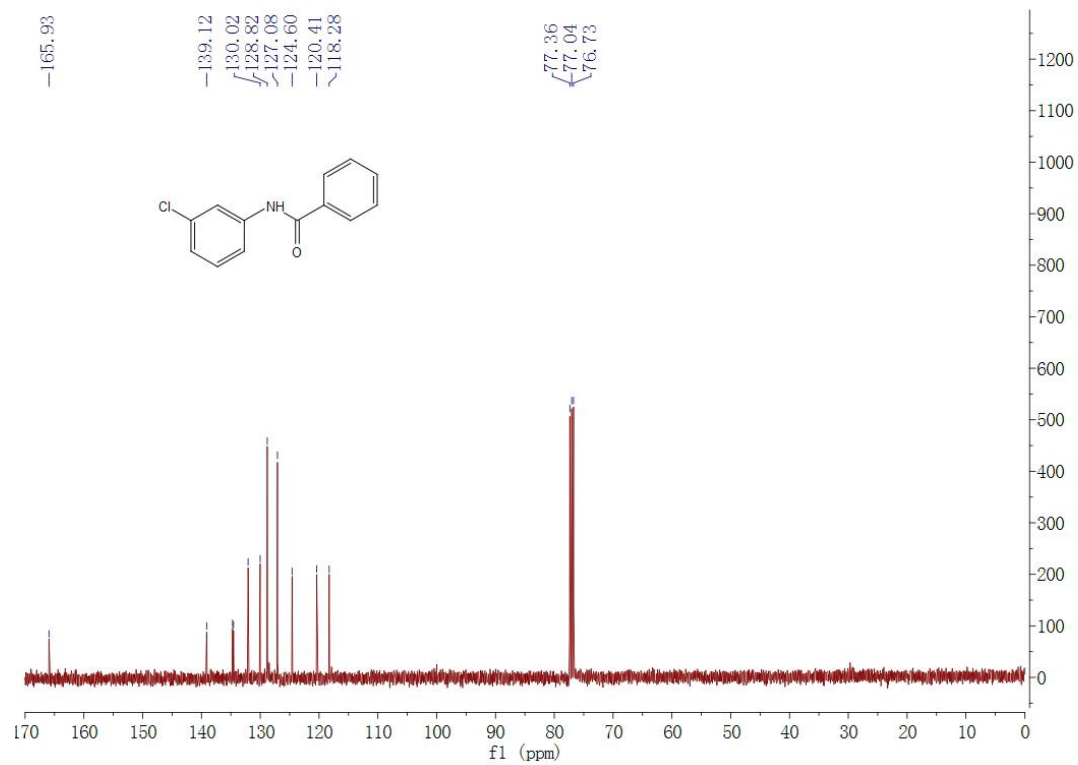

***N*-(4-Chlorophenyl)benzamide (Table 2, entry 5)**

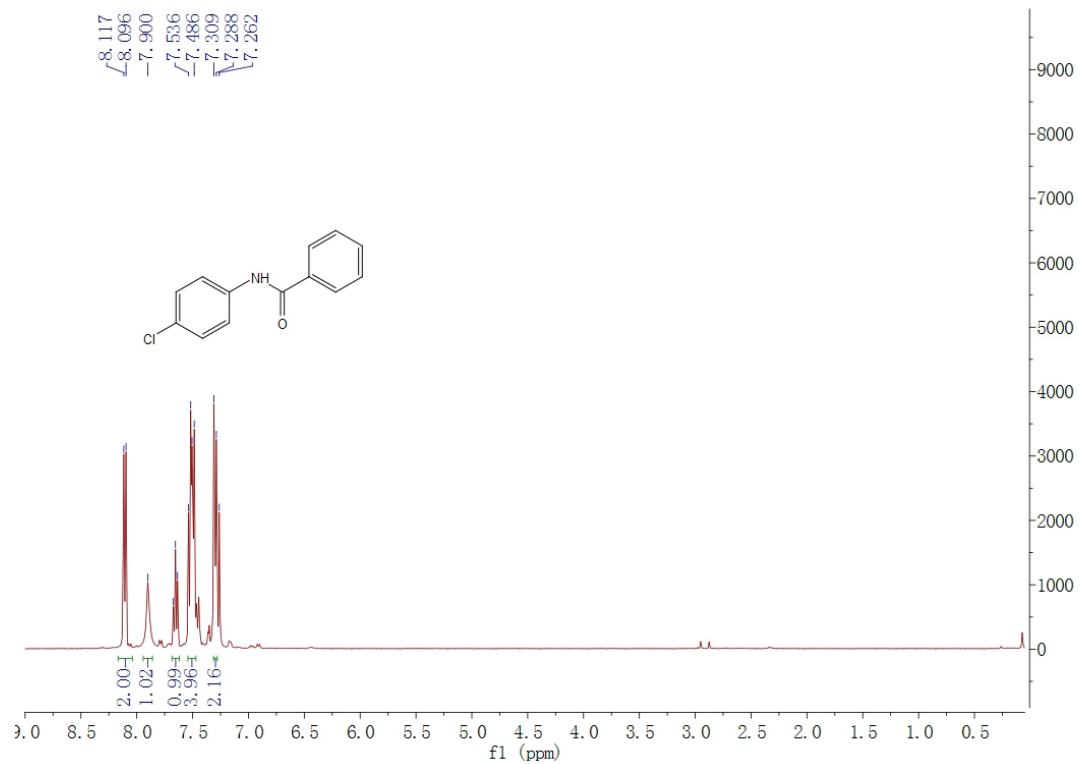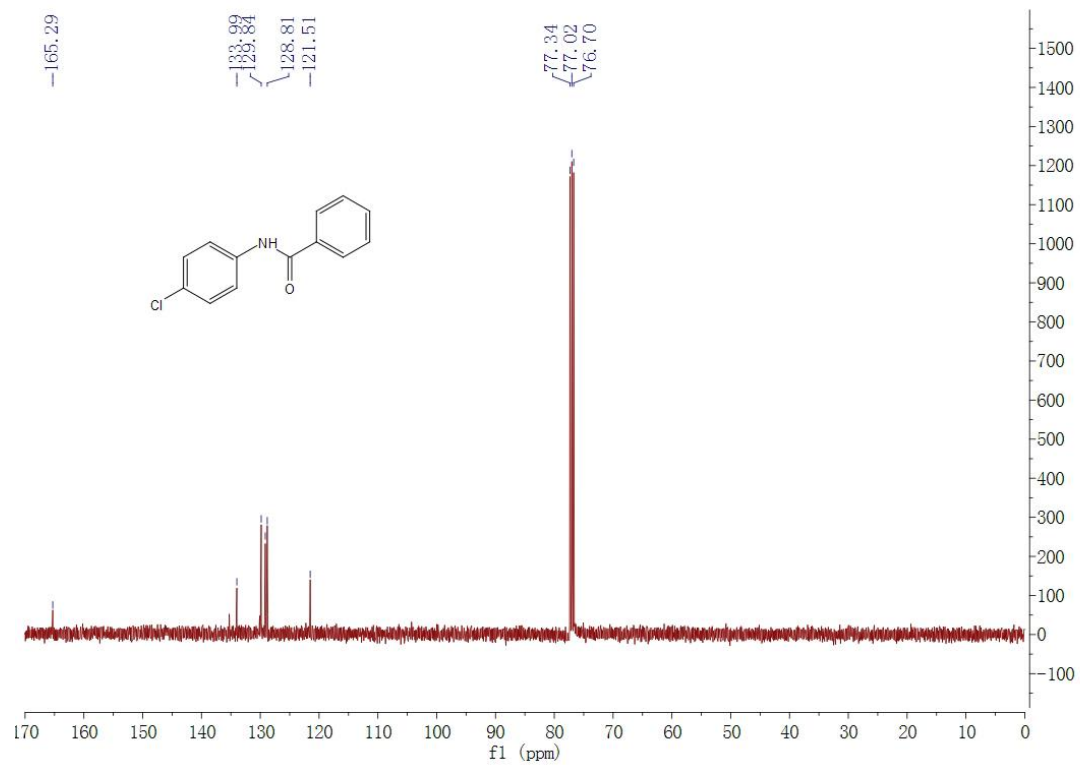

***N*-(4-Methoxyphenyl)benzamide (Table 2, entry 6)**

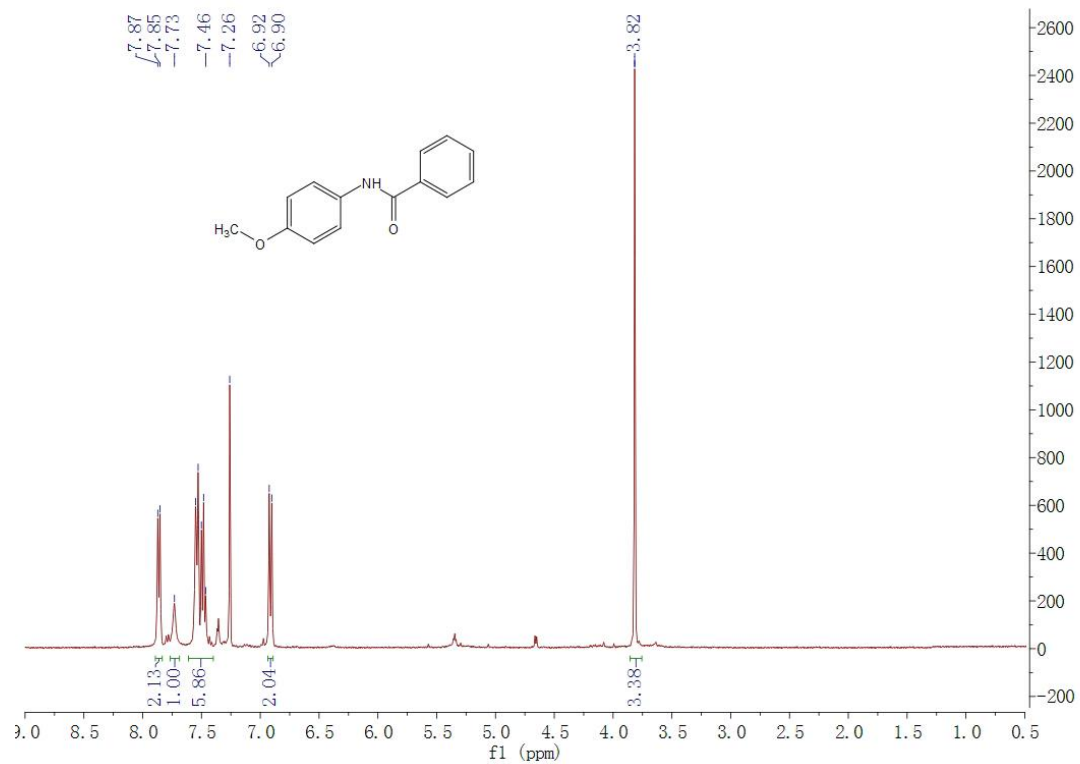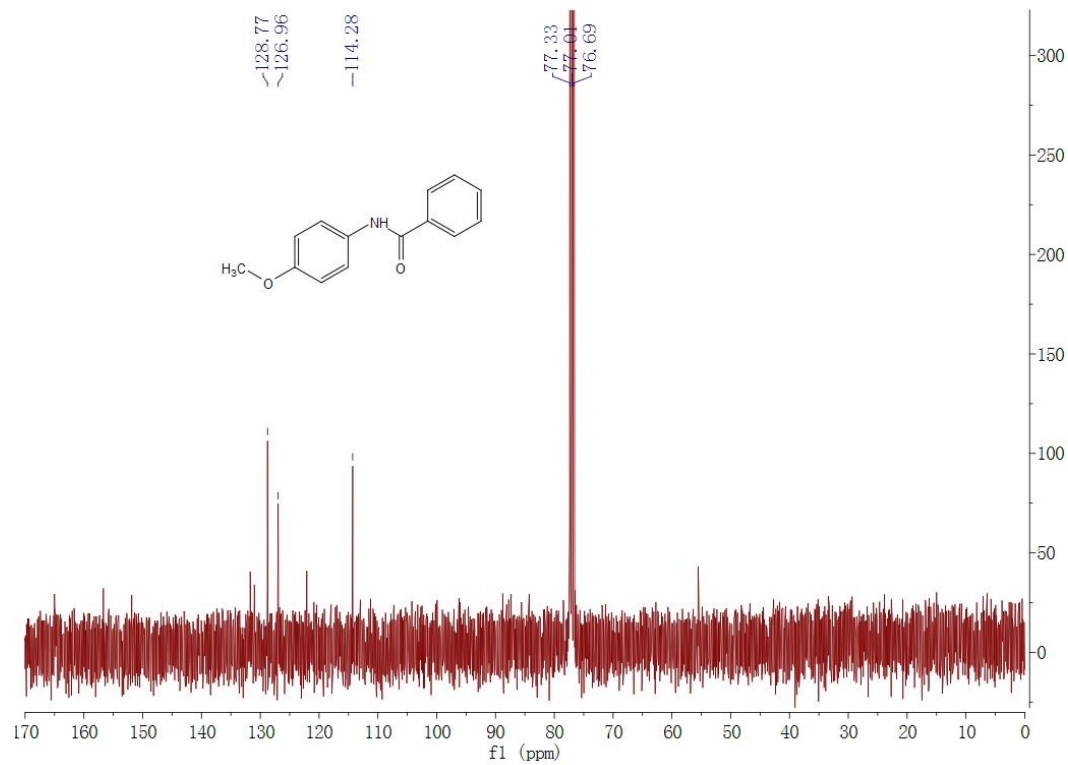

***N*-(4-Ethoxyphenyl)benzamide (Table 2, entry 7)**

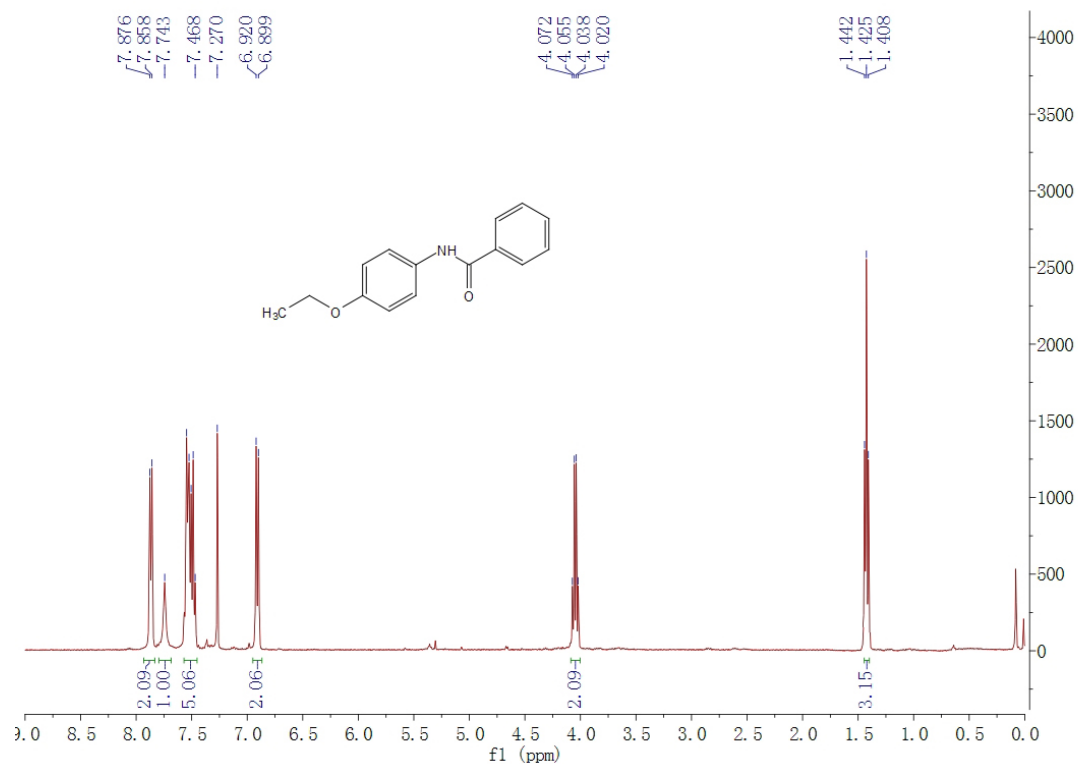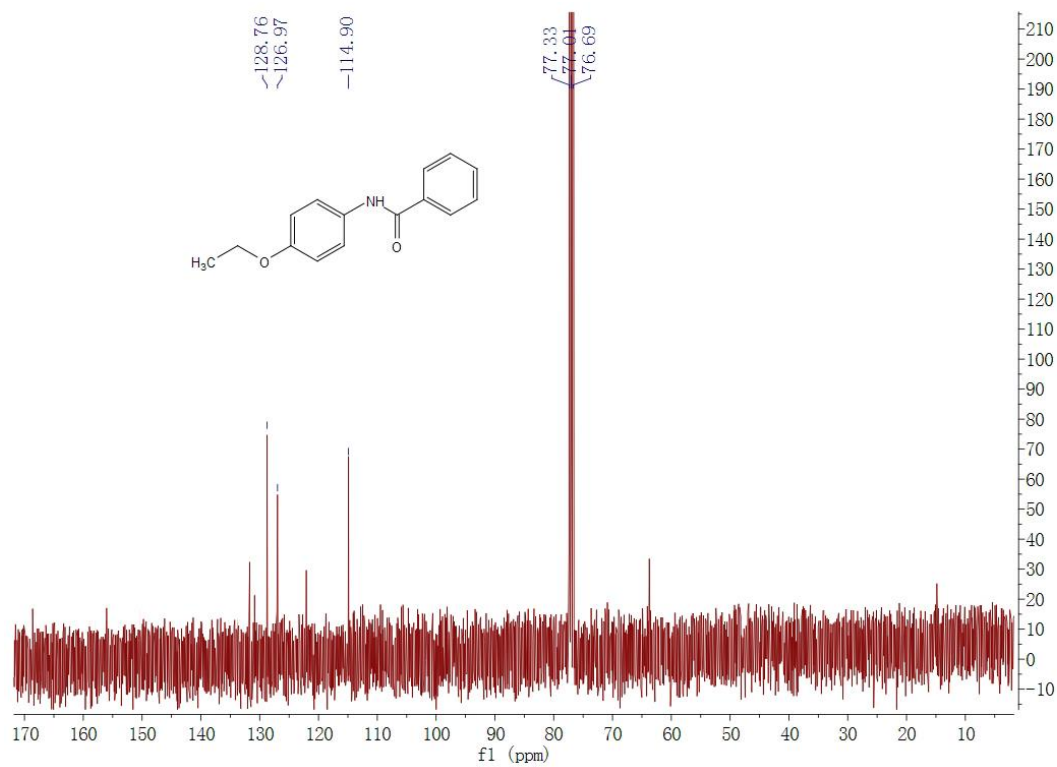

***N*-(4-Cyanophenyl)benzamide (Table 2, entry 8)**

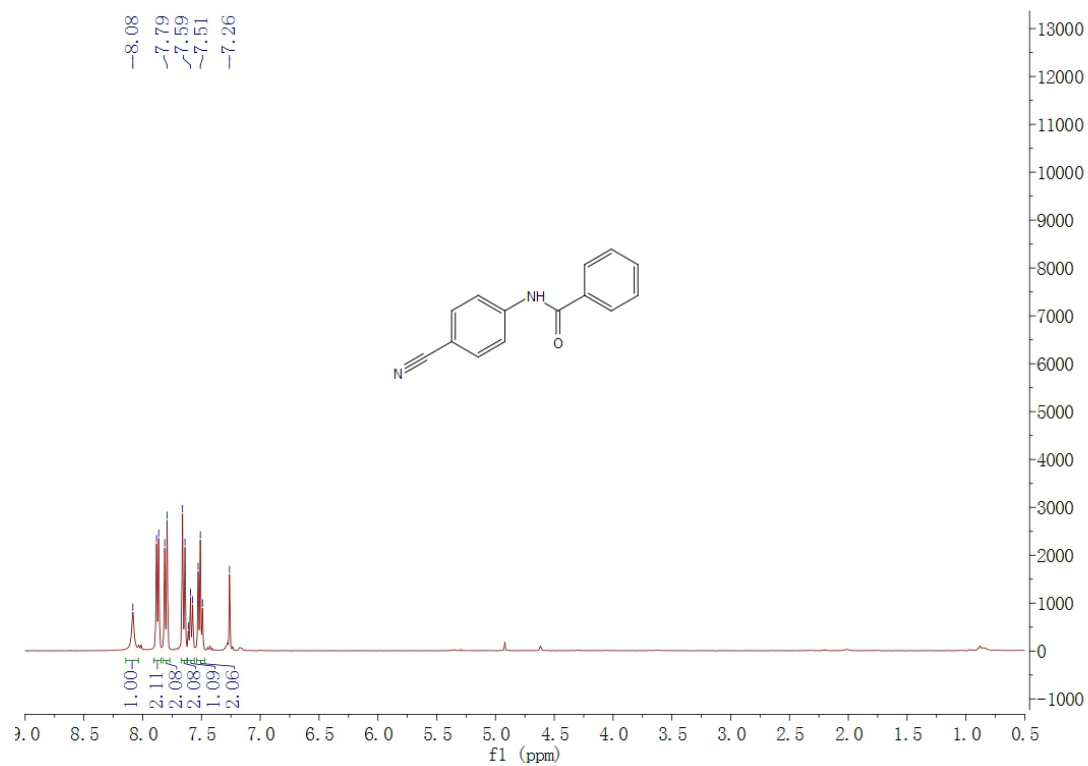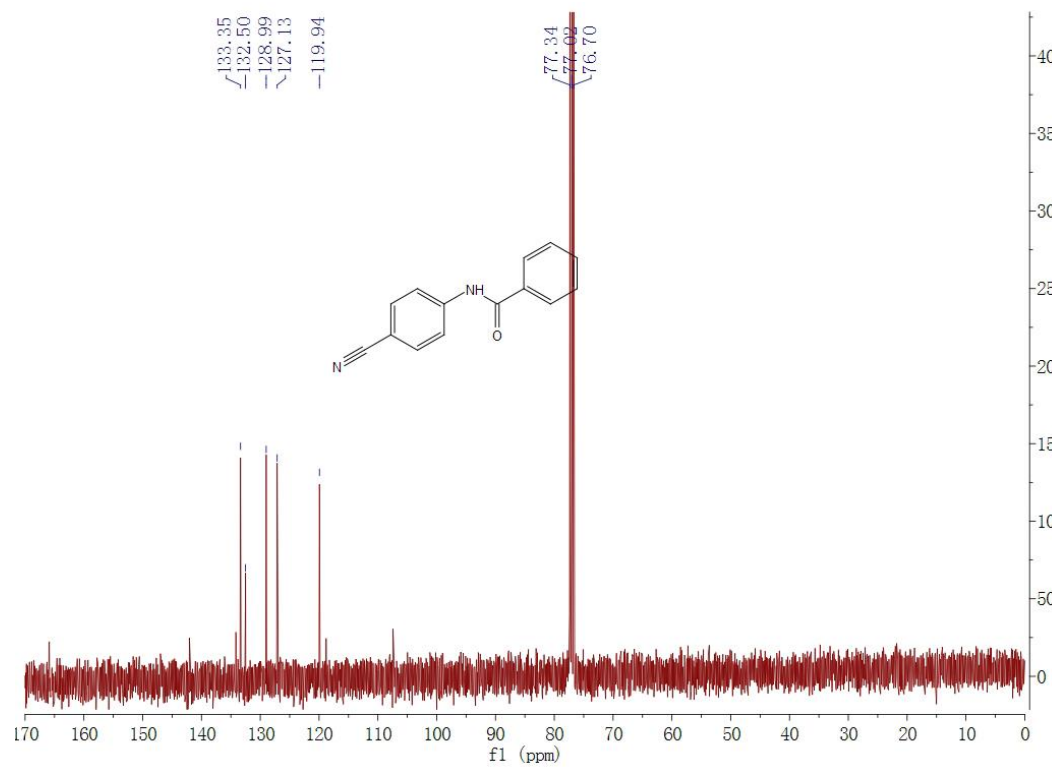

***N*-(*o*-Tolyl)benzamide (Table 2, entry 9)**

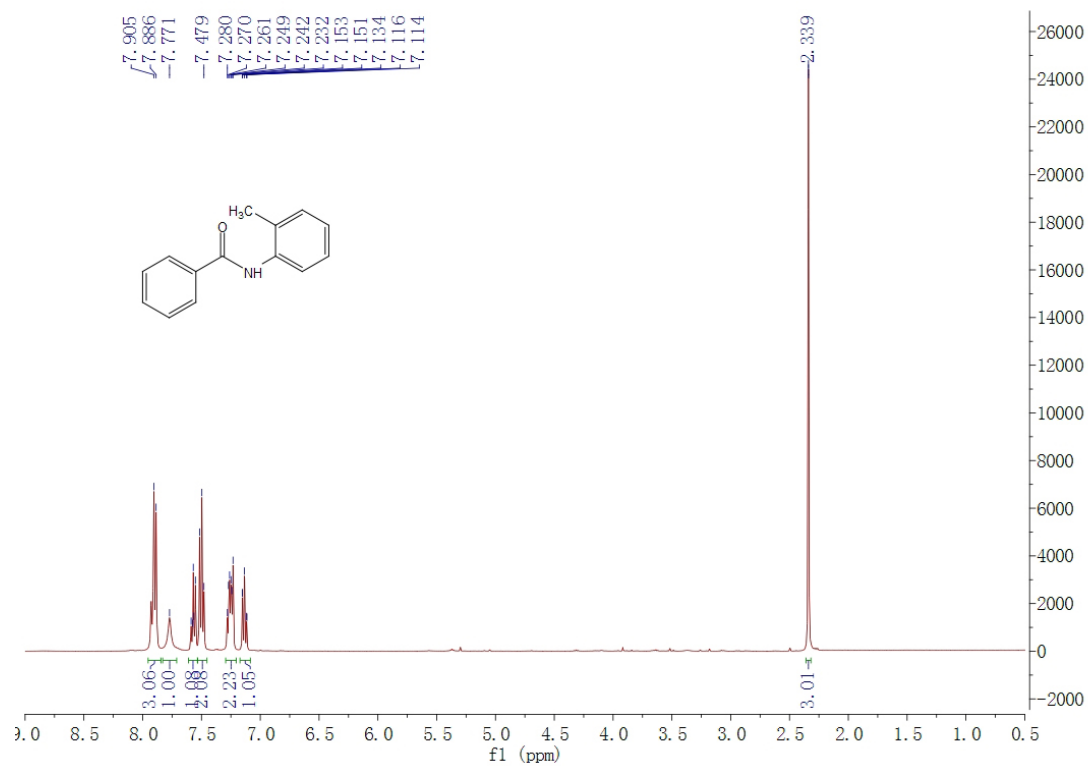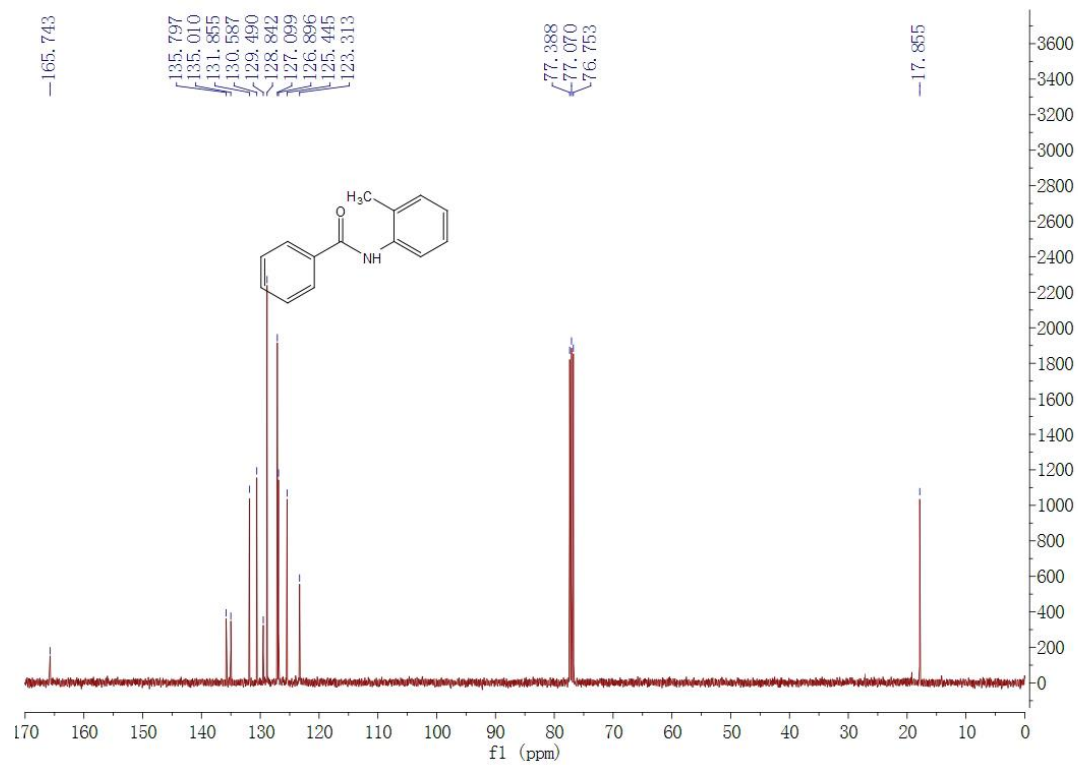

***N*-(*m*-Tolyl)benzamide (Table 2, entry 10)**

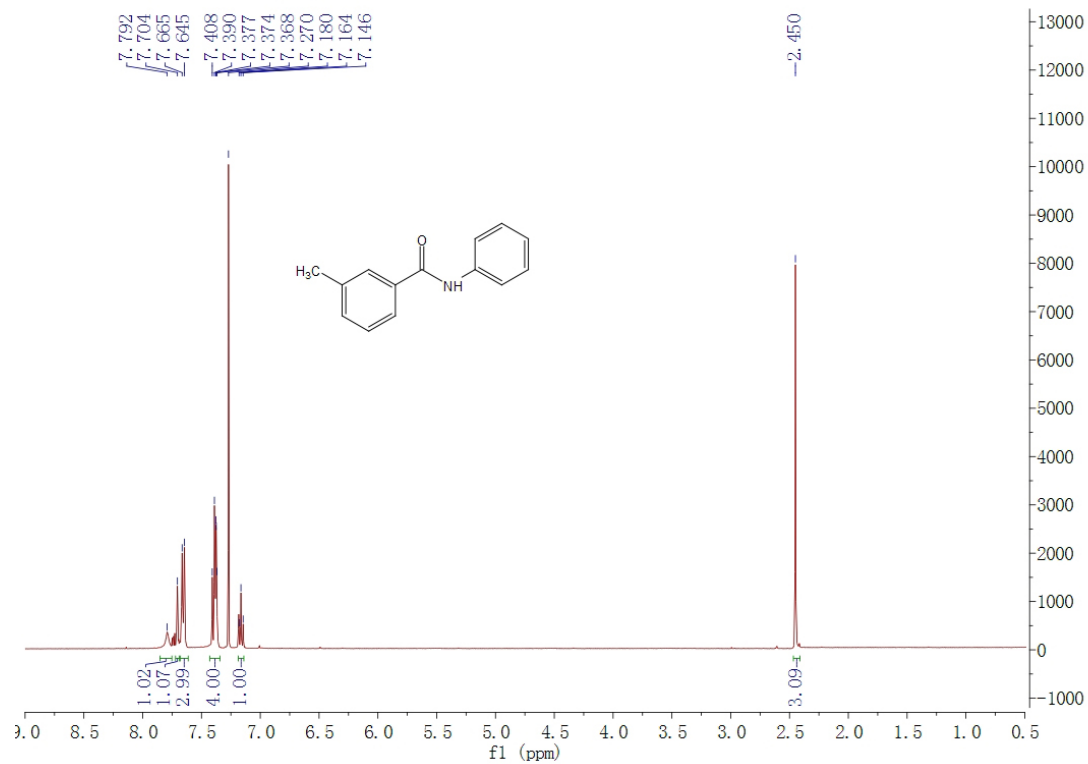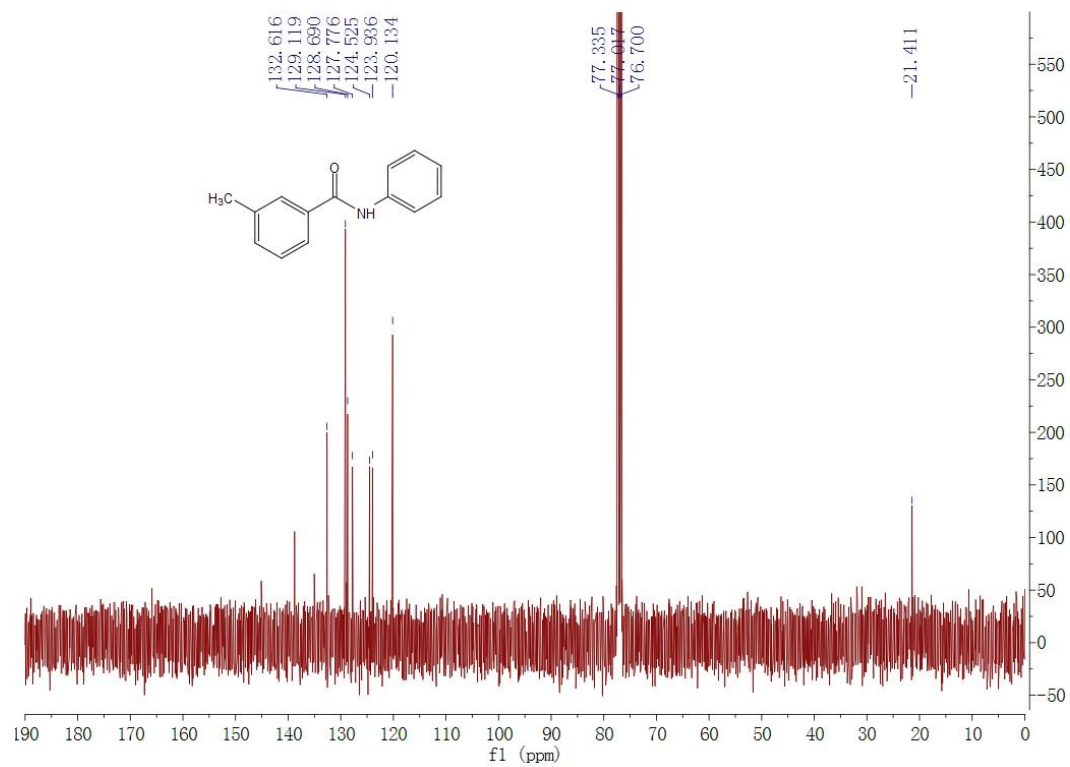



**4-Methyl-N-phenylbenzamide (Table 2, entry 11)**

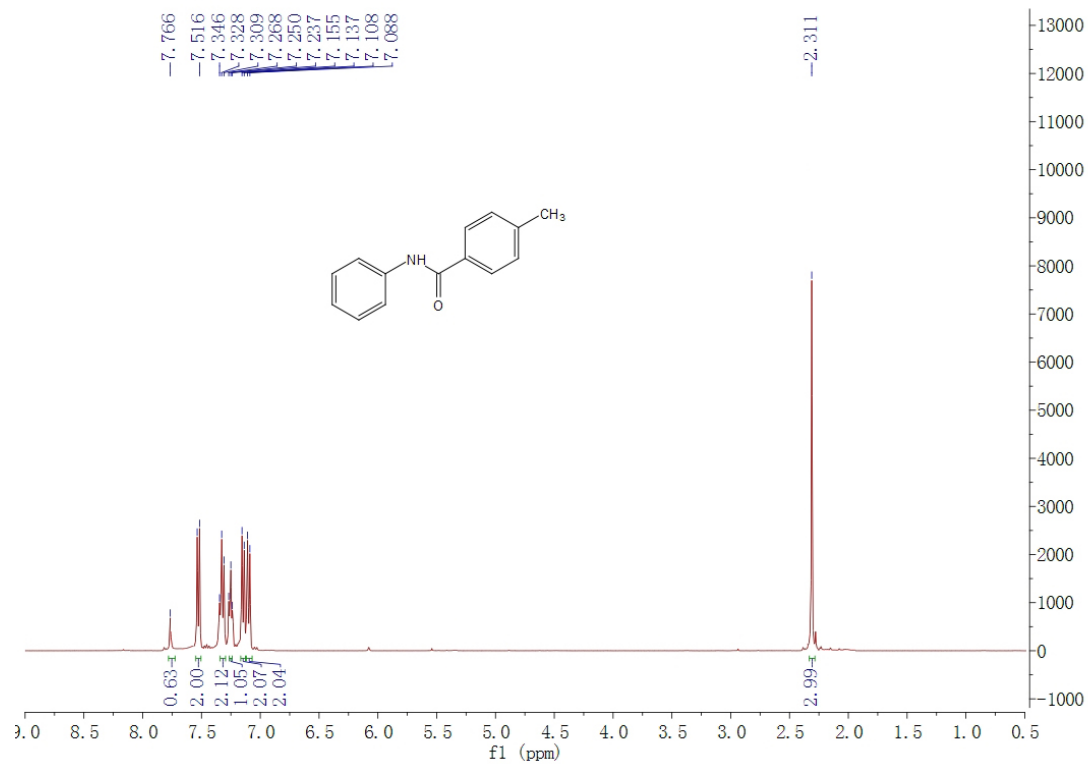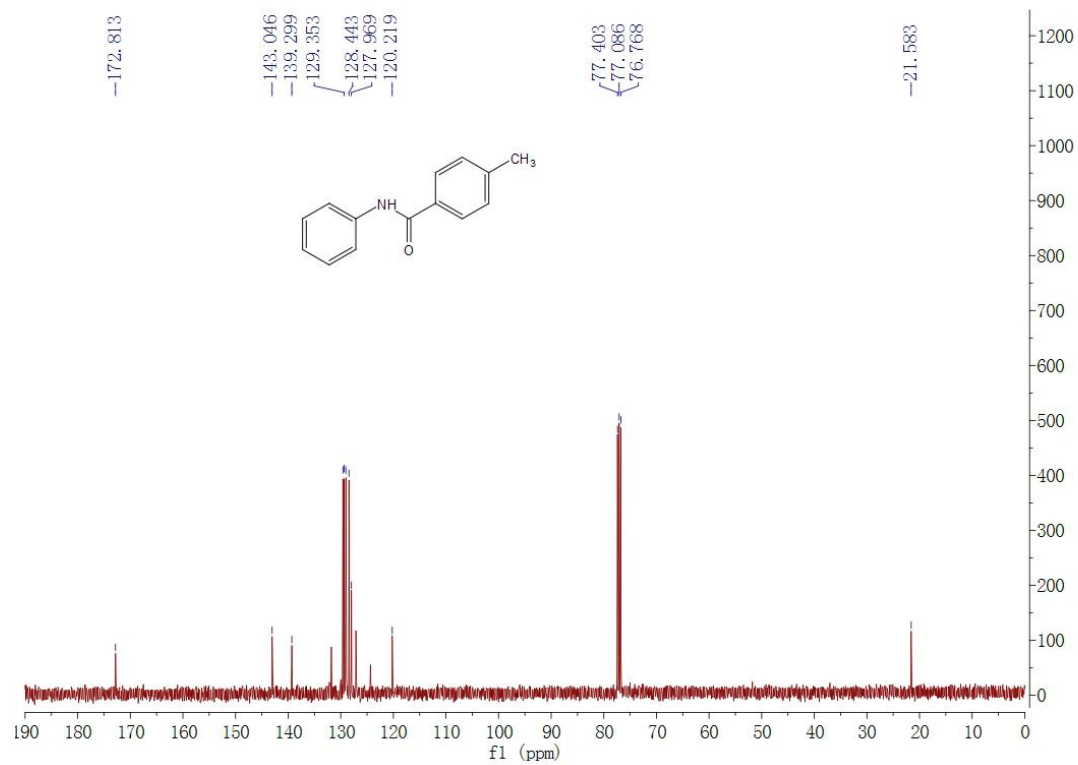

**4-Methyl-N-(p-tolyl)benzamide (Table 2, entry 12)**

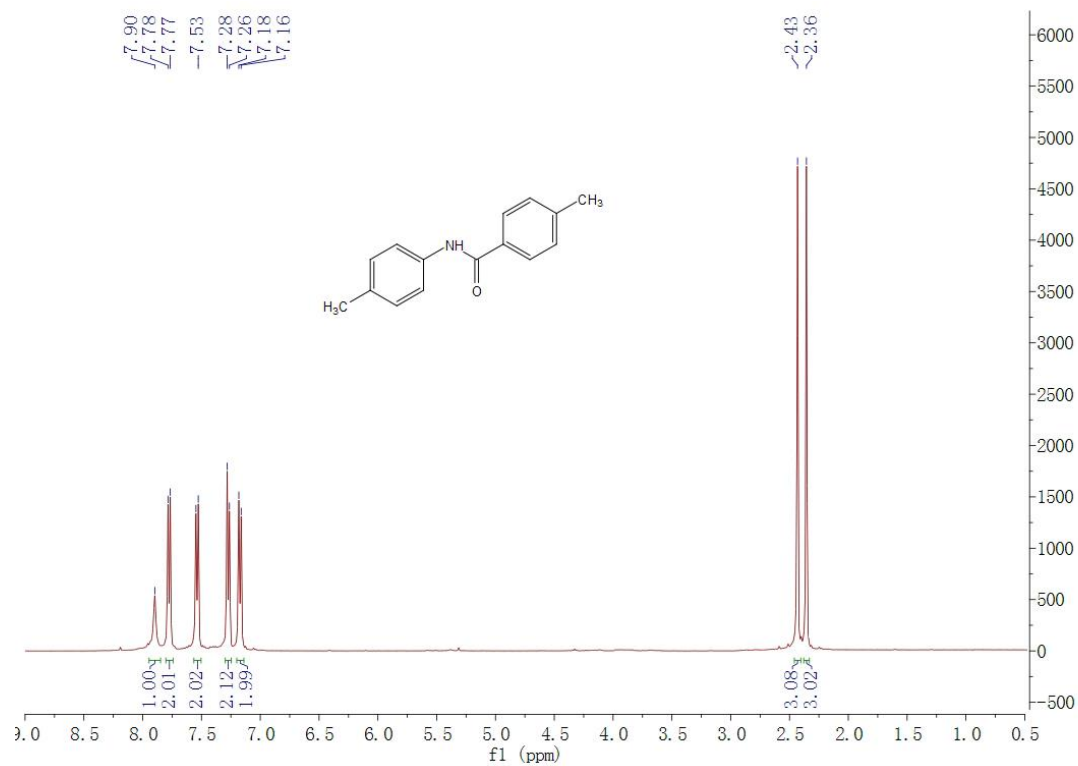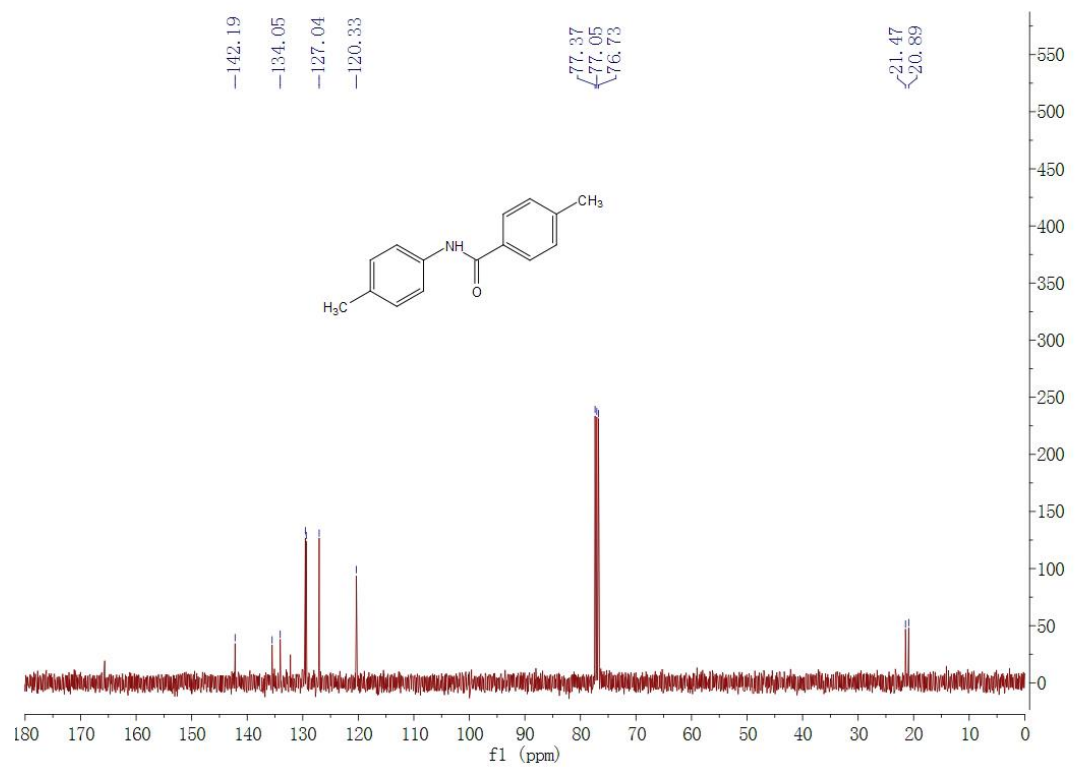

***N*-(2-Chlorophenyl)-4-methylbenzamide (Table 2, entry 13)**

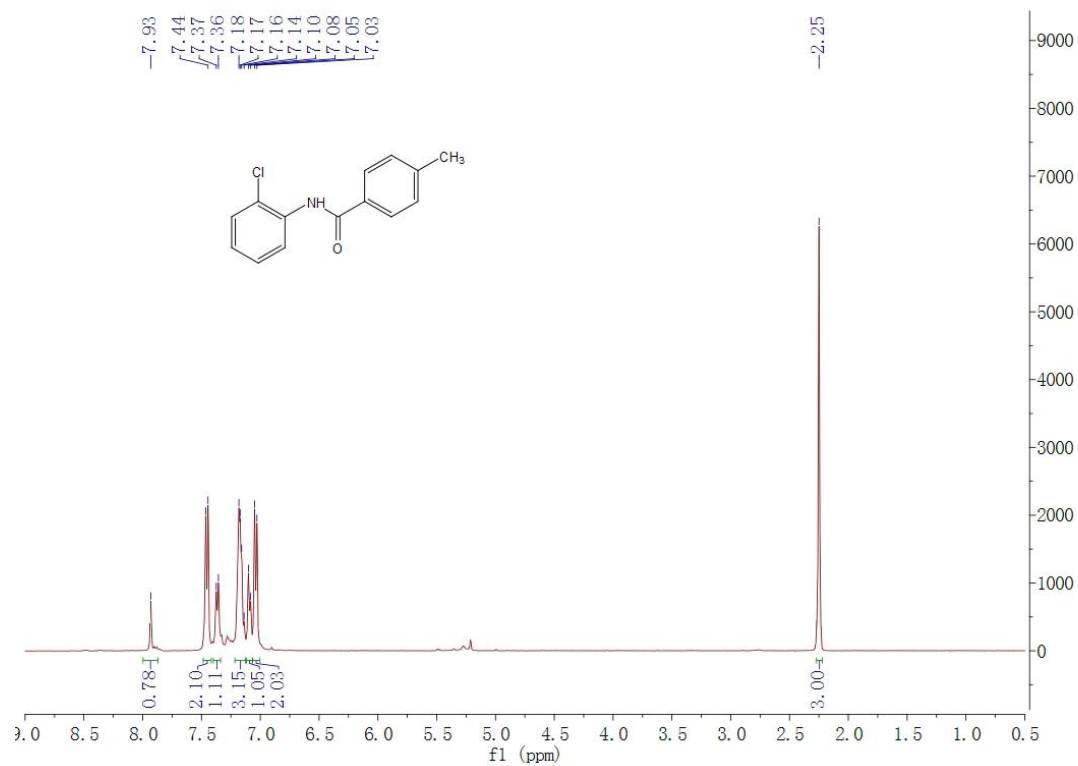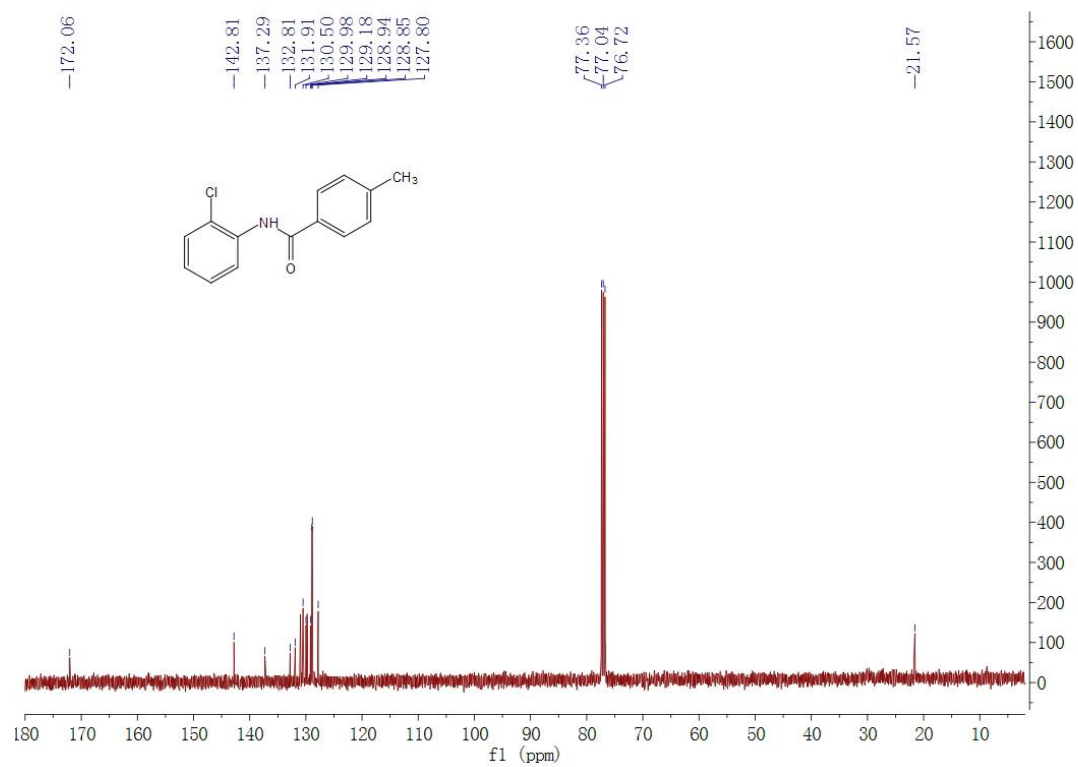

***N*-(3-Chlorophenyl)-4-methylbenzamide (Table 2, entry 14)**

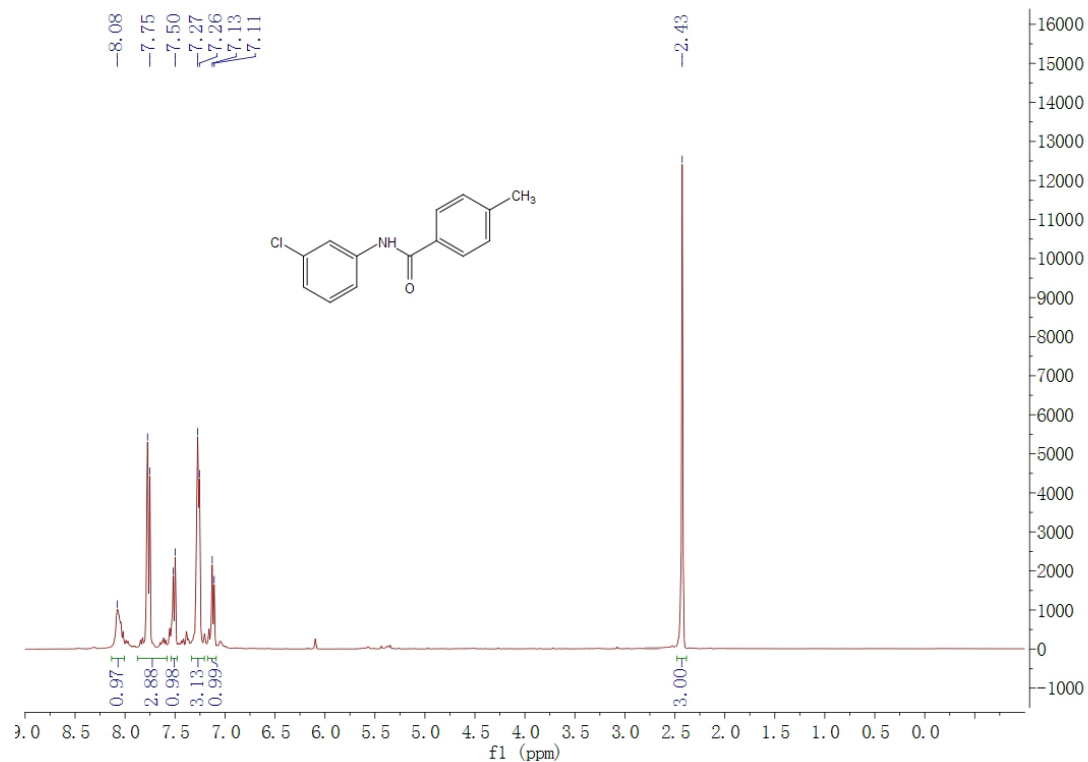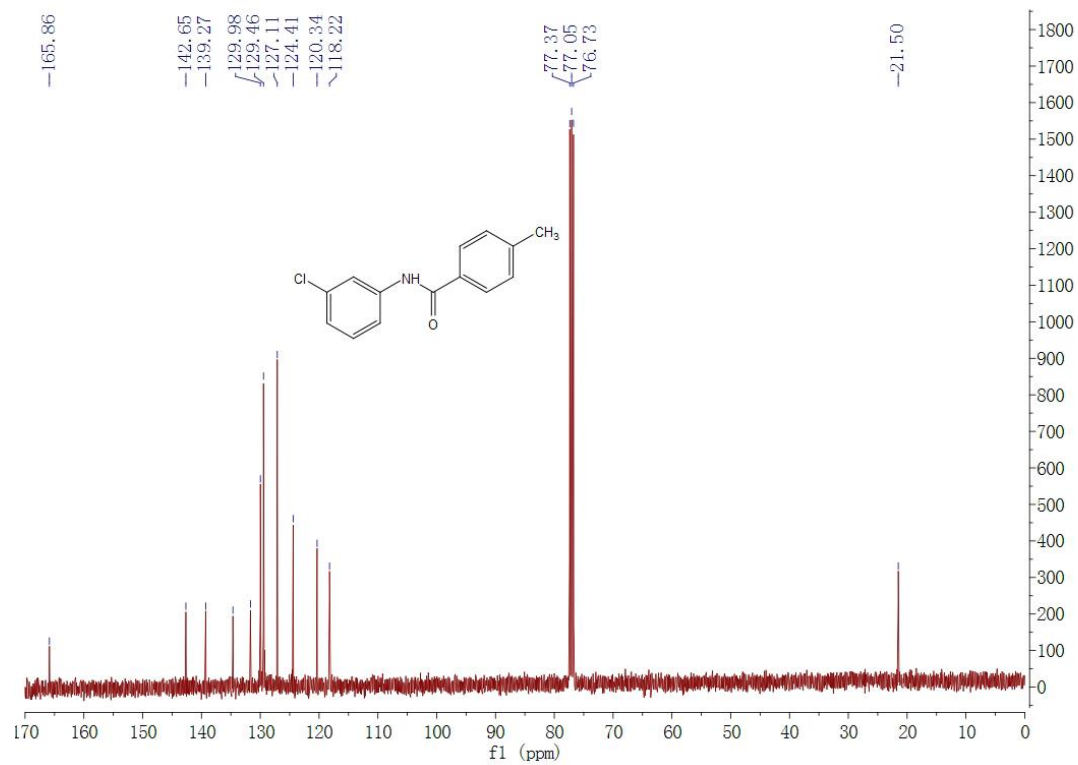

***N*-(4-Methoxyphenyl)-4-methylbenzamide (Table 2, entry 15)**

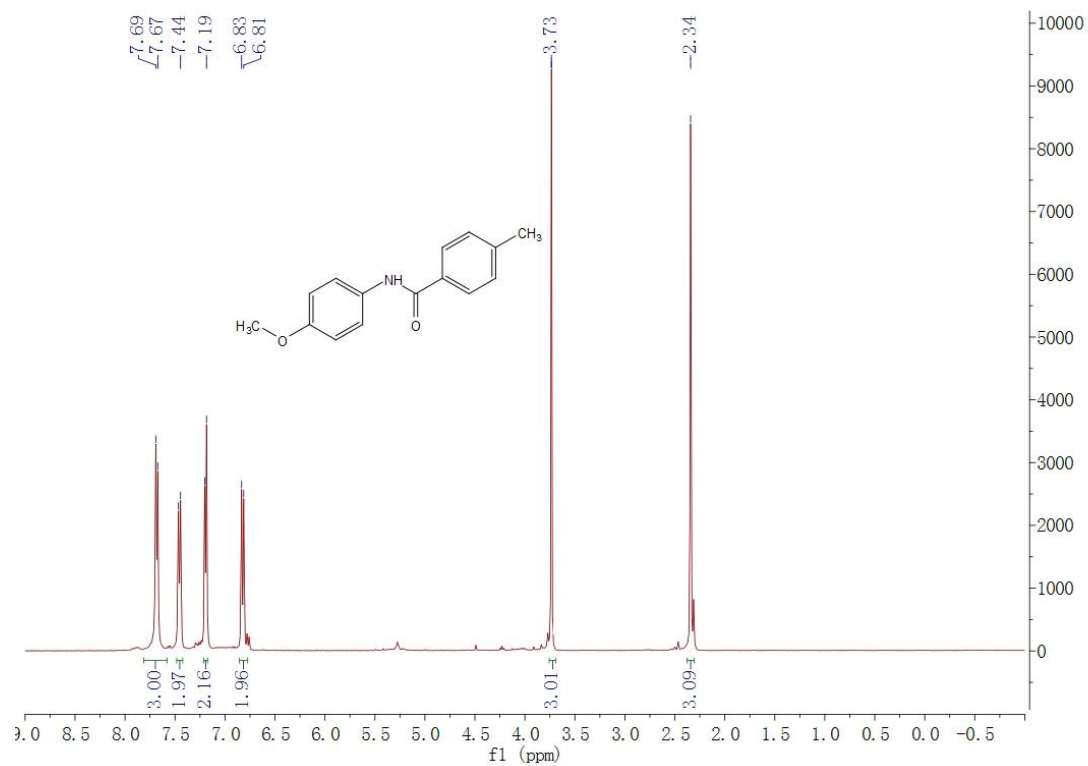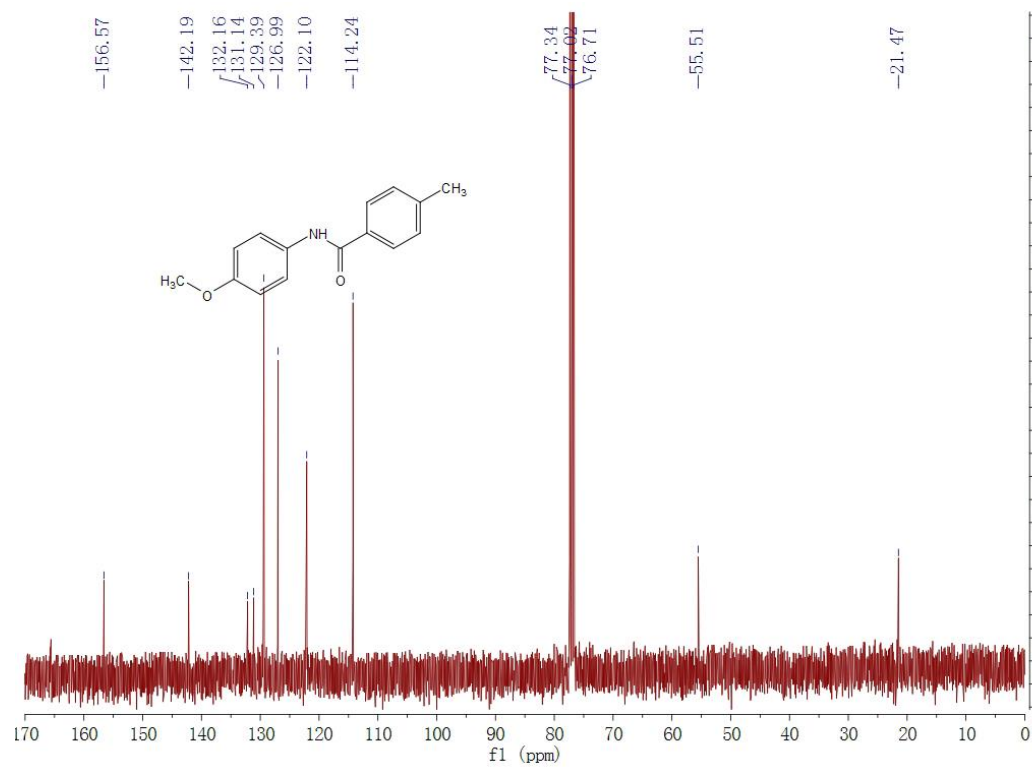

Supplement: Additional file 1 [file 1860-5397-12-217-S1.pdf]
